# Supplementary material for: Partitioning of prototropic species of an anticancer drug ellipticine in bile salt aggregates of different head groups and hydrophobic skeletons: a photophysical study to probe bile salts as multisite drug carriers
Source: Royal Society of Chemistry journal article supplement (doi:10.1039/c4cp01308e), 2014-01-01
Supplement: c4cp01308e1.pdf [file c4cp01308e1.pdf]

**Partitioning of Prototropic Species of an Anticancer Drug Ellipticine in Bile Salt  
Aggregates of Different Head Groups and Hydrophobic Skeleton: A Phtophysical Study to  
Probe Bile Salt as Multisite Drug Carrier**

**Raina Thakur, Anupam Das, Chandan Adhikari and Anjan Chakraborty\***

**Author to correspondence:**

Dr. Anjan Chakraborty  
Department of Chemistry,  
Indian Institute of Technology Indore  
IET, M-Block,  
Email: [anjan@iiti.ac.in](mailto:anjan@iiti.ac.in)  
Fax: +91(0)731-2366382  
Tel: +91(0)731-2438706

**Supporting information**

**Table S1.** The decay components of ellipticine in presence of different bile salts at 440 nm.

| System                | a <sub>1</sub><br>(%) | a <sub>2</sub> (%) | τ <sub>1</sub> (ns) | τ <sub>2</sub> (ns) | <τ> (ns) | χ <sup>2</sup> |
|-----------------------|-----------------------|--------------------|---------------------|---------------------|----------|----------------|
| <b>Conc. of NaDC</b>  |                       |                    |                     |                     |          |                |
| 0                     | 0.90                  | 0.10               | 0.400               | 3.40                | 0.700    | 1.3            |
| 2                     | 0.85                  | 0.15               | 0.600               | 3.65                | 1.000    | 1.2            |
| 4                     | 0.80                  | 0.20               | 0.600               | 3.80                | 1.24     | 1.1            |
| 6                     | 0.77                  | 0.23               | 0.650               | 4.0                 | 1.42     | 1.00           |
| 8                     | 0.73                  | 0.27               | 0.73                | 4.25                | 1.68     | 1.05           |
| 10                    | 0.70                  | 0.30               | 0.80                | 4.50                | 1.91     | 1.2            |
| 12                    | 0.68                  | 0.32               | 0.967               | 4.60                | 2.13     | 1.6            |
| 16                    | 0.65                  | 0.35               | 0.890               | 4.40                | 2.12     | 1.2            |
| 20                    | 0.62                  | 0.38               | 0.860               | 4.29                | 2.16     | 1.1            |
| 25                    | 0.60                  | 0.40               | 0.860               | 4.29                | 2.23     | 1.0            |
| <b>Conc. of NaTC</b>  |                       |                    |                     |                     |          |                |
| 2                     | 0.88                  | 0.12               | 0.587               | 2.45                | 0.81     | 1.2            |
| 4                     | 0.89                  | 0.11               | 0.717               | 3.380               | 1.00     | 1.4            |
| 6                     | 0.85                  | 0.15               | 0.600               | 3.63                | 1.00     | 1.4            |
| 8                     | 0.82                  | 0.18               | 0.670               | 4.00                | 1.27     | 1.3            |
| 10                    | 0.80                  | 0.20               | 0.75                | 4.50                | 1.50     | 1.2            |
| 12                    | 0.78                  | 0.22               | 0.830               | 5.62                | 1.88     | 1.1            |
| 16                    | 0.75                  | 0.25               | 0.815               | 6.166               | 2.15     | 1.1            |
| 20                    | 0.76                  | 0.24               | 0.871               | 6.535               | 2.23     | 1.3            |
| 25                    | 0.76                  | 0.24               | 0.871               | 6.535               | 2.23     | 1.3            |
| <b>Conc. of NaTDC</b> |                       |                    |                     |                     |          |                |
| 2                     | 0.88                  | 0.12               | 0.7                 | 2.5                 | 0.92     | 1.4            |
| 4                     | 0.89                  | 0.11               | 0.77                | 3.2                 | 1.00     | 1.2            |
| 6                     | 0.85                  | 0.15               | 0.600               | 3.4                 | 1.00     | 1.4            |
| 8                     | 0.82                  | 0.18               | 0.780               | 3.8                 | 1.32     | 1.3            |
| 10                    | 0.80                  | 0.20               | 0.80                | 4.5                 | 1.54     | 1.1            |
| 12                    | 0.78                  | 0.22               | 0.83                | 5.00                | 1.74     | 1.1            |

|    |      |      |      |     |      |     |
|----|------|------|------|-----|------|-----|
| 16 | 0.75 | 0.25 | 0.86 | 5.4 | 1.99 | 1.2 |
| 20 | 0.76 | 0.24 | 0.85 | 5.6 | 1.99 | 1.2 |
| 25 | 0.76 | 0.24 | 0.85 | 5.6 | 1.99 | 1.1 |

**Conc. of NaC**

|    |      |       |       |      |      |     |
|----|------|-------|-------|------|------|-----|
| 2  | 0.86 | 0.14  | 0.6   | 3.5  | 1.0  | 1.3 |
| 4  | 0.80 | 0.20  | 0.650 | 3.86 | 1.29 | 1.3 |
| 6  | 0.80 | 0.20  | 0.72  | 4.0  | 1.38 | 1.4 |
| 8  | 0.80 | 0.20  | 0.75  | 4.26 | 1.45 | 1.2 |
| 12 | 0.76 | 0.24  | 0.715 | 4.26 | 1.56 | 1.4 |
| 16 | 0.75 | 0.25  | 0.85  | 4.76 | 1.83 | 1.5 |
| 20 | 0.73 | 0.27  | .923  | 5.00 | 2.0  | 1.4 |
| 25 | 0.75 | 0.258 | 1.01  | 5.30 | 2.12 | 1.4 |

**Conc. of NaGDC**

|    |      |      |       |      |         |     |
|----|------|------|-------|------|---------|-----|
| 2  | 0.84 | 0.16 | 0.518 | 3.32 | 0.96632 | 1.2 |
| 4  | 0.77 | 0.23 | 0.861 | 4.53 | 1.70487 | 1.3 |
| 6  | 0.72 | 0.28 | 1.04  | 5.65 | 2.3308  | 1.3 |
| 8  | 0.69 | 0.31 | 1.06  | 5.77 | 2.5201  | 1.4 |
| 10 | 0.66 | 0.34 | 1.1   | 5.80 | 2.698   | 1.4 |
| 12 | 0.64 | 0.36 | 1.116 | 6.28 | 2.97504 | 1.2 |
| 16 | 0.62 | 0.38 | 1.20  | 6.40 | 3.176   | 1.2 |
| 20 | 0.65 | 0.35 | 1.20  | 6.35 | 3.0025  | 1.1 |
| 25 | 0.65 | 0.35 | 1.15  | 6.40 | 2.9875  | 1.1 |
